# Supplementary material for: A new method of synthesis of Sb2Se3/rGO as a high-rate and low-temperature anode for sodium–ion batteries
Source: Royal Society of Chemistry journal article supplement (doi:10.1039/d2ma00170e), 2022-01-01
Supplement: d2ma00170e1.pdf [file d2ma00170e1.pdf]

## Supporting information

### **A new method of synthesis Sb<sub>2</sub>Se<sub>3</sub>/rGO as a high-rate and low-temperature anode for sodium-ion batteries**

Lulu Hu<sup>a</sup>, Jun Pan<sup>b</sup>, Pei Zhao<sup>b</sup>, Gejun Shi<sup>a</sup>, Baofeng Wang<sup>a,\*</sup>, Fuqiang Huang<sup>b,c,\*</sup>

*a. Shanghai Key Laboratory of Materials Protection and Advanced Materials in Electric Power, Shanghai University of Electric Power, Shanghai 200090, China*

*b. State Key Laboratory of High Performance Ceramics and Superfine Microstructure, Shanghai Institute of Ceramics, Chinese Academy of Sciences, Shanghai 200050, China*

*c. Beijing National Laboratory for Molecular Sciences and State Key Laboratory of Rare Earth Materials Chemistry and Applications, College of Chemistry and Molecular Engineering, Peking University, Beijing 100871, China*

\*Corresponding author. email: [wangbaofeng@shiep.edu.cn](mailto:wangbaofeng@shiep.edu.cn) (Baofeng Wang);  
[huangfq@mail.sic.ac.cn](mailto:huangfq@mail.sic.ac.cn) (Fuqiang Huang)

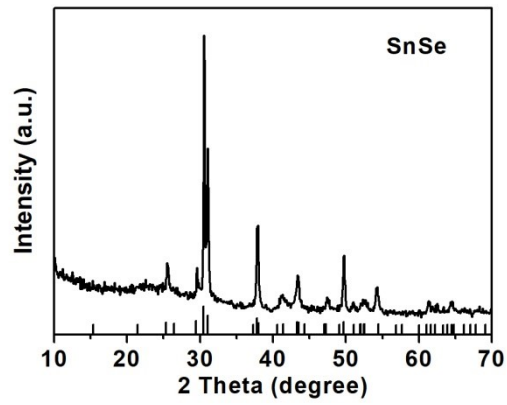

Figure S1. XRD pattern of SnSe.

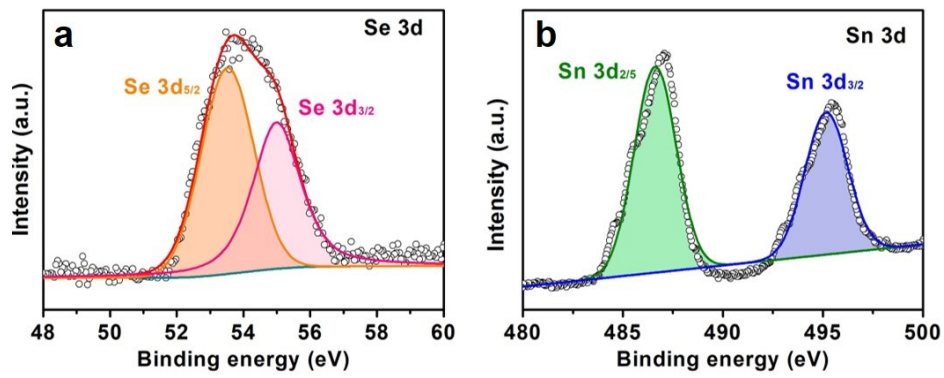

Figure S2. XPS spectra of (a) Se 3d, (b) Sn 3d of SnSe.

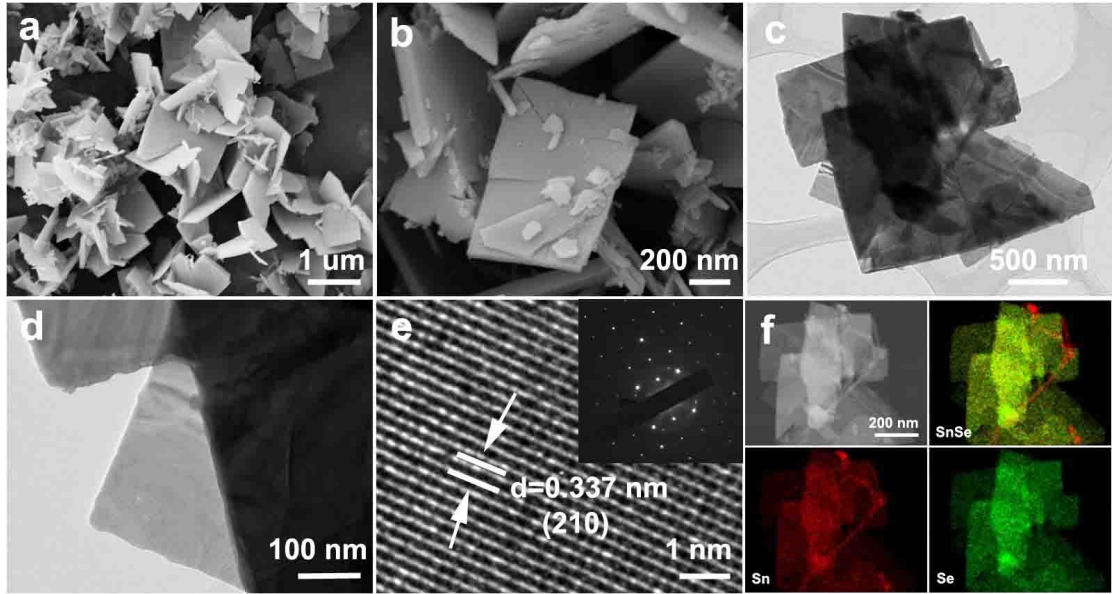

**Figure S3.** (a,b) SEM images, (c,d) TEM images, (e) HRTEM image, (f) elemental mapping of SnSe.

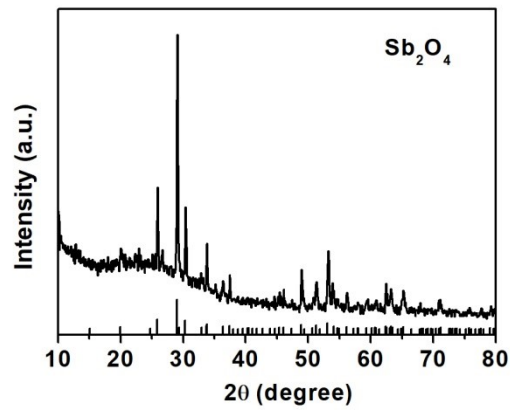

**Figure S4.** XRD pattern of Sb<sub>2</sub>O<sub>4</sub>.

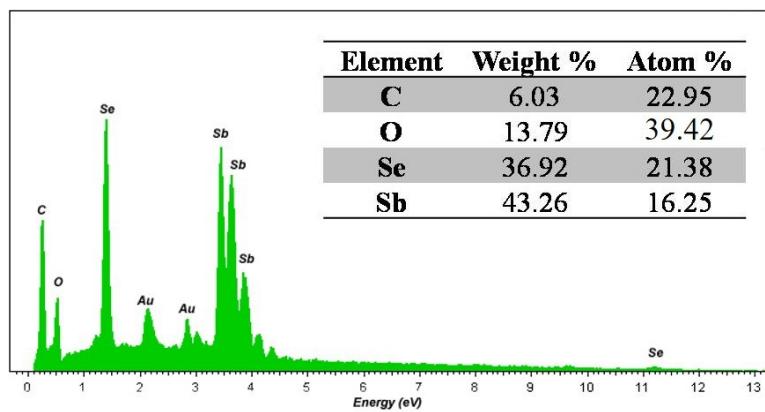

Figure S5. EDS of  $\text{Sb}_2\text{Se}_3/\text{rGO}$ .

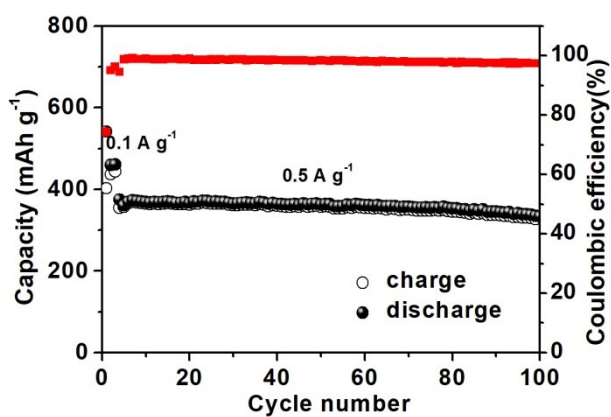

Figure S6. Cycling performance of SnSe.

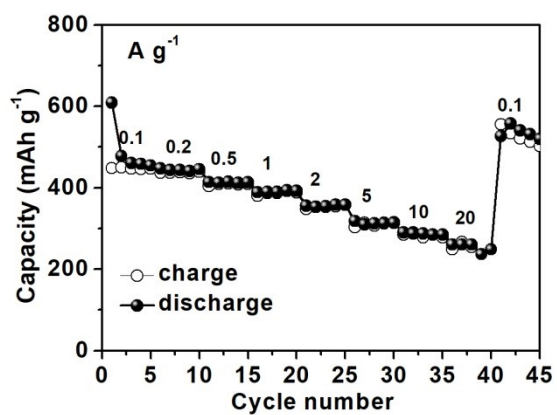

Figure S7. Rate performance of SnSe.

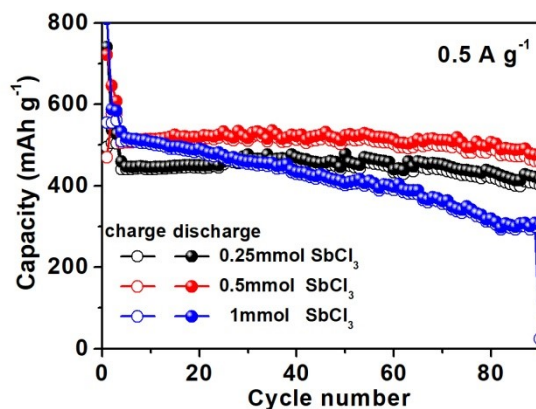

**Figure S8.** Cycling performance of  $\text{Sb}_2\text{Se}_3/\text{rGO}$  with different content of  $\text{SbCl}_3$ .

Insufficient amount of  $\text{SbCl}_3$  causes incomplete  $\text{SnSe}$  conversion, resulting in low capacity of  $\text{Sb}_2\text{Se}_3/\text{rGO}$ . On the other hand, excessive amount of  $\text{SbCl}_3$  leads to the hydrolysis of  $\text{SbCl}_3$  and the production of by-products, resulting in the decrease of cycle stability of  $\text{Sb}_2\text{Se}_3/\text{rGO}$ .

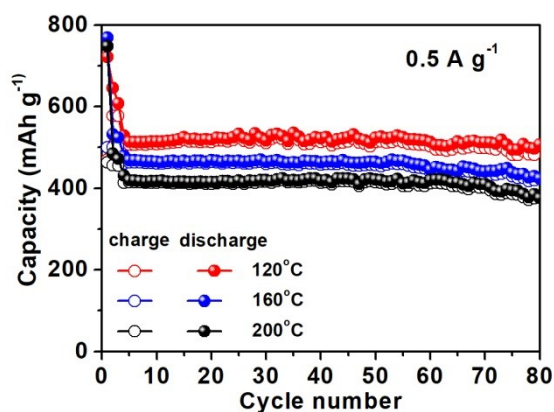

**Figure S9.** Cycling performance of  $\text{Sb}_2\text{Se}_3/\text{rGO}$  in different temperatures of hydrothermal reaction.

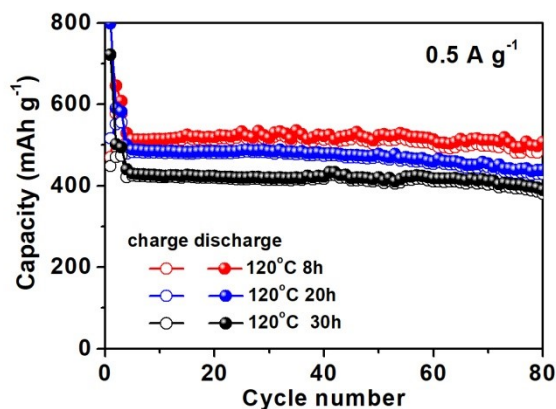

**Figure S10.** Cycling performance of  $\text{Sb}_2\text{Se}_3/\text{rGO}$  with different hydrothermal reaction time.

With the increase of reaction temperature and the reaction time, the  $\text{Sb}_2\text{Se}_3$  nanoparticles agglomerate heavily, which is bad for the sodiation/desodiation, resulting the slowly reaction kinetics of sodium ion diffusion and storage, and leading to the low capacity and poor cycle stability of  $\text{Sb}_2\text{Se}_3/\text{rGO}$ .

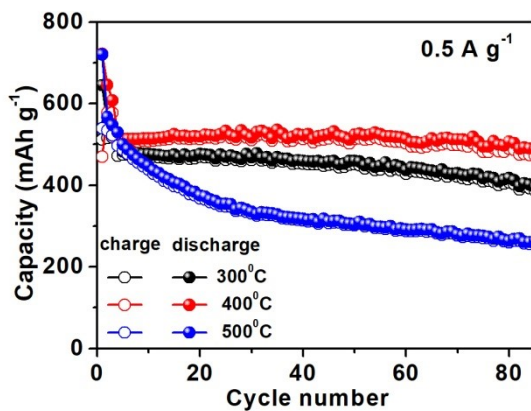

**Figure S11.** Cycling performance of  $\text{Sb}_2\text{Se}_3/\text{rGO}$  with different calcination temperatures.

If the calcination temperature is not high enough, the crystallization of  $\text{Sb}_2\text{Se}_3$  and the reduction of graphene are not sufficient, causing the low capacity of  $\text{Sb}_2\text{Se}_3/\text{rGO}$ . On the other hand, if the calcination temperature is too high, it can cause the loss and the agglomeration of  $\text{Sb}_2\text{Se}_3$  nanoparticles, leading to the poor cycle stability.

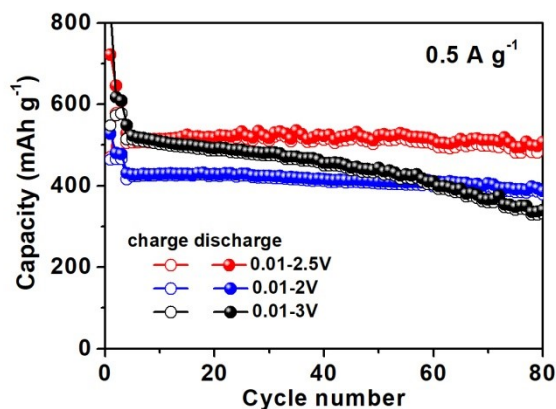

**Figure S12.** Cycling performance of  $\text{Sb}_2\text{Se}_3/\text{rGO}$  with different cut-off voltages.

In the larger voltage range of 0.01-3V, some side reactions such as the decomposition of the electrolyte will occur, resulting in deterioration of the cycle stability of  $\text{Sb}_2\text{Se}_3/\text{rGO}$ . Under the relatively small voltage range of 0.01-2V, part of the transformation mechanism is not included, resulting in the reduction of capacity of  $\text{Sb}_2\text{Se}_3/\text{rGO}$ .

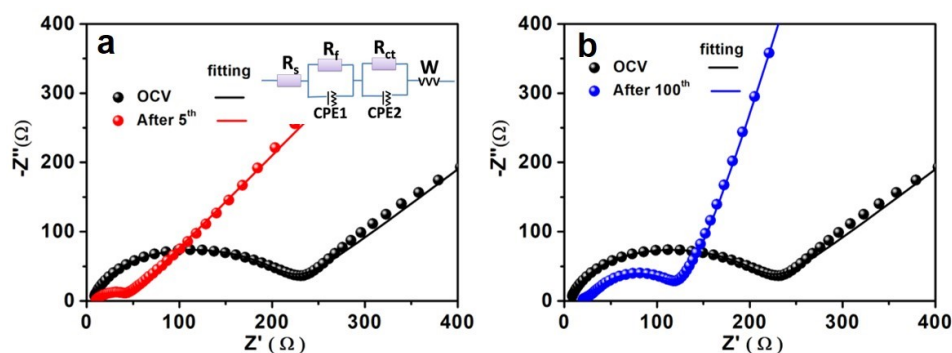

**Figure S13.** Nyquist plots of  $\text{Sb}_2\text{Se}_3/\text{rGO}$  at a current density of  $0.5 \text{ A g}^{-1}$ . (a) After 5 cycles. (b) After 100 cycles

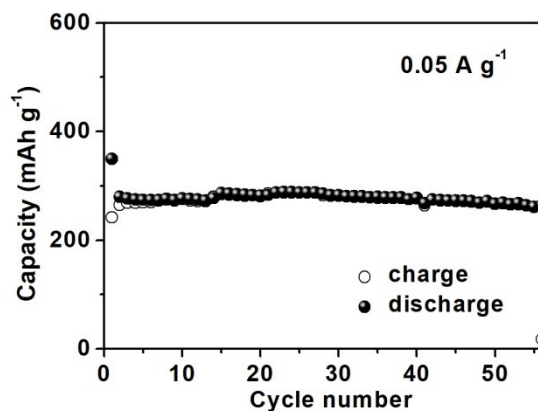

**Figure S14.** Cycling performance of SnSe under -15°C at the current density of 0.05 A g<sup>-1</sup>.

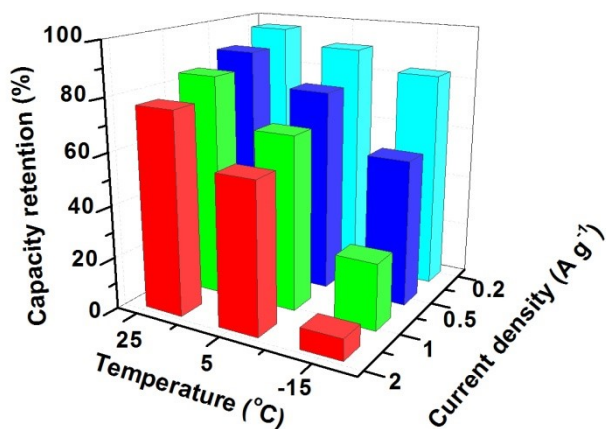

**Figure S15.** The capacity retentions of SnSe along with temperature variations between 25 and -15 °C at various current density of 0.2, 0.5, 1, 2 A g<sup>-1</sup>.



**Table S1.** Fitting data of components in equivalent circuit

|                | $R_s$ ( $\Omega$ ) | $R_{ct}$ ( $\Omega$ ) | $R_f$ ( $\Omega$ ) |
|----------------|--------------------|-----------------------|--------------------|
| Before cycling | 11.3               | 157                   | 45.9               |
| After cycling  | 10                 | 30.1                  | 11                 |
